# Supplementary material
Source: PubMed Central journal article supplement (PMC3395319)
Supplement: NIHMS388073-supplement-supplement_1.pdf [file NIHMS388073-supplement-supplement_1.pdf]

**eTable 1.** One-year prevalence (%) of *substance use* among adolescents aged 12–17 years by race or ethnicity (N=72,561)

| Prevalence,<br>% (95% CI) | White            | African<br>American | Native<br>American | Asian or Pacific<br>Islander | Multiple-Race    | Hispanic         | $\chi^2$ (5) |
|---------------------------|------------------|---------------------|--------------------|------------------------------|------------------|------------------|--------------|
| Sample size               | N=43,778         | N=10,109            | N=1122             | N=2481                       | N=2814           | N=12,257         |              |
| <b>Ages 12–13 years</b>   |                  |                     |                    |                              |                  |                  |              |
| Alcohol or drug           | 14.7 (14.0–15.4) | 16.2 (14.5–18.1)    | 27.1 (18.1–38.5)   | 11.6 (8.7–15.3)              | 16.3 (13.7–19.3) | 16.5 (14.9–18.1) | <.05         |
| Alcohol and drug          | 3.6 (3.3–4.0)    | 2.5 (1.7–3.6)       | 6.4 (4.2–9.9)      | 1.6 (0.7–3.4)                | 3.5 (2.3–5.3)    | 4.1 (3.3–5.2)    | <.01         |
| Alcohol                   | 10.5 (9.9–11.0)  | 8.4 (7.3–9.7)       | 17.7 (11.3–26.5)   | 4.7 (3.2–7.0)                | 10.1 (7.9–12.8)  | 11.4 (10.3–12.7) | <.01         |
| Any drug <sup>a</sup>     | 7.9 (7.4–8.4)    | 10.3 (8.7–12.1)     | 15.9 (9.8–24.7)    | 8.5 (5.7–12.4)               | 9.7 (7.7–12.1)   | 9.1 (7.7–10.8)   | <.01         |
| <b>Ages 14–15 years</b>   |                  |                     |                    |                              |                  |                  | <.01         |
| Alcohol or drug           | 39.6 (38.6–40.6) | 33.1 (31.2–35.1)    | 53.0 (41.9–63.8)   | 19.1 (15.0–24.0)             | 38.8 (32.5–45.4) | 38.9 (36.9–40.9) | <.01         |
| Alcohol and drug          | 14.8 (14.1–15.4) | 10.2 (9.1–11.4)     | 21.8 (14.0–32.4)   | 5.3 (3.7–7.5)                | 17.0 (13.3–21.5) | 13.5 (12.0–15.1) | <.01         |
| Alcohol                   | 35.3 (34.3–36.3) | 25.5 (23.5–27.5)    | 42.9 (30.9–55.8)   | 15.2 (11.9–19.2)             | 33.2 (27.8–39.0) | 34.0 (31.7–36.3) | <.01         |
| Any drug <sup>a</sup>     | 19.0 (18.3–19.8) | 17.8 (16.3–19.4)    | 32.0 (23.1–42.3)   | 9.1 (6.6–12.4)               | 22.6 (18.1–27.9) | 18.3 (16.7–20.1) | <.01         |
| <b>Ages 16–17 years</b>   |                  |                     |                    |                              |                  |                  | <.01         |
| Alcohol or drug           | 61.3 (60.3–62.3) | 45.9 (43.8–47.9)    | 62.3 (53.5–70.4)   | 40.2(35.4–45.1)              | 56.9 (51.6–62.0) | 55.4 (53.3–57.5) | <.01         |
| Alcohol and drug          | 29.0 (28.0–30.0) | 19.9 (18.4–21.6)    | 33.7 (25.2–43.3)   | 13.5 (10.2–17.7)             | 35.8 (30.8–41.1) | 24.5 (22.5–26.6) | <.01         |
| Alcohol                   | 58.2 (57.2–59.2) | 38.9 (36.9–40.9)    | 50.0 (39.9–60.2)   | 36.2 (31.5–41.1)             | 53.0 (47.4–58.6) | 52.0 (49.8–54.2) | <.01         |
| Any drug <sup>a</sup>     | 32.1 (31.1–33.1) | 26.9 (25.2–28.7)    | 46.0 (36.6–55.7)   | 17.5 (14.0–21.6)             | 39.6 (35.0–44.5) | 27.9 (25.7–30.2) | <.01         |

Abbreviation: CI, confidence interval.

<sup>a</sup> Any drug includes any of the following: marijuana, inhalants, cocaine, hallucinogens, heroin, analgesic opioids, stimulants, sedatives, and tranquilizers.

**eTable 2.** Characteristics of adolescents aged 12–17 years by race or ethnicity (N=72,561)

| Selected characteristics, % (95% CI) | White            | African American | Native American  | Asian or Pacific Islander | Multiple-Race    | Hispanic         | $\chi^2$ (df)<br>P-value |
|--------------------------------------|------------------|------------------|------------------|---------------------------|------------------|------------------|--------------------------|
| Sample size                          | N=43,778         | N=10,109         | N=1122           | N=2481                    | N=2814           | N=12,257         |                          |
| Age in years                         |                  |                  |                  |                           |                  |                  |                          |
| 12–13                                | 31.6 (31.1–32.2) | 31.2 (29.9–32.5) | 32.1 (27.5–37.2) | 29.9 (27.5–32.5)          | 35.8 (33.2–38.5) | 33.5 (32.4–34.6) | 36.4(10)                 |
| 14–15                                | 33.9 (33.3–34.6) | 34.4 (33.1–35.6) | 37.6 (32.3–43.2) | 37.7 (35.0–40.4)          | 32.9 (30.5–35.4) | 34.5 (33.5–35.6) | <.001                    |
| 16–17                                | 34.5 (33.9–35.1) | 34.4 (33.2–35.7) | 30.3 (25.7–35.3) | 32.4 (29.9–35.0)          | 31.3 (29.0–33.8) | 32.0 (30.8–33.2) |                          |
| Gender                               |                  |                  |                  |                           |                  |                  |                          |
| Male                                 | 51.2 (50.5–51.9) | 50.5 (49.3–51.8) | 49.9 (43.5–56.2) | 51.5 (48.8–54.3)          | 47.1 (43.9–50.4) | 51.2 (49.9–52.5) | 5.8(5)                   |
| Female                               | 48.8 (48.1–49.5) | 49.4 (48.2–50.7) | 50.1 (43.8–56.5) | 48.5 (45.7–51.2)          | 52.9 (49.6–56.1) | 48.8 (47.5–50.1) | 0.335                    |
| Family income                        |                  |                  |                  |                           |                  |                  |                          |
| <\$40,000                            | 25.7 (24.9–26.4) | 63.8 (62.0–65.5) | 56.2 (50.2–62.1) | 37.7 (34.7–40.8)          | 35.4 (32.7–38.2) | 56.7 (54.9–58.4) | 287.0(10)                |
| \$40,000–\$74,999                    | 31.0 (30.3–31.7) | 23.4 (22.2–24.6) | 30.3 (25.2–36.0) | 28.6 (26.1–31.3)          | 34.0 (30.8–37.2) | 26.8 (25.4–28.3) | <.001                    |
| \$75,000+                            | 43.3 (42.5–44.2) | 12.8 (11.8–13.9) | 13.4 (9.7–18.3)  | 33.7 (30.7–36.8)          | 30.7 (27.6–33.9) | 16.5 (15.4–17.7) |                          |
| Population density                   |                  |                  |                  |                           |                  |                  |                          |
| Large-metropolitan                   | 44.7 (43.7–45.8) | 63.8 (62.0–65.6) | 20.9 (15.6–26.2) | 75.9 (73.1–78.4)          | 48.6 (45.5–51.7) | 63.5 (61.9–65.2) | 124.1(10)                |
| Small-metropolitan                   | 46.6 (45.7–47.6) | 31.6 (29.7–33.5) | 44.8 (37.7–52.1) | 23.5 (20.9–26.2)          | 46.4 (43.3–49.6) | 33.4 (31.7–35.2) | <.001                    |
| Non-metropolitan                     | 8.7 (8.2–9.2)    | 4.6 (3.6–5.8)    | 34.4 (27.0–42.6) | 0.7 (0.4–1.3)             | 5.0 (4.1–6.0)    | 3.0 (2.5–3.7)    |                          |
| Poor or fair self-rated health       |                  |                  |                  |                           |                  |                  |                          |
| Yes                                  | 3.1 (2.8–3.4)    | 4.9 (4.4–5.5)    | 6.8 (5.0–9.2)    | 3.4 (2.2–5.3)             | 4.2 (3.3–5.3)    | 4.9 (4.3–5.5)    | 62.3(5)                  |
| No                                   | 96.9 (96.7–97.2) | 95.1 (94.6–95.6) | 93.2 (90.8–95.0) | 96.6 (94.7–97.8)          | 95.8 (94.7–96.7) | 95.1 (94.5–95.7) | <.001                    |

Abbreviation: CI, confidence interval.

**eTable 3.** One-year prevalence (%) of *substance use disorders* among adolescents aged 12–17 years by race or ethnicity (N=72,561)

| Abuse or dependence,<br>% (95% CI) | White         | African-<br>American | Native-American  | Asian or<br>Pacific<br>Islander | Multiple-Race  | Hispanic      | $\chi^2$ (5) |
|------------------------------------|---------------|----------------------|------------------|---------------------------------|----------------|---------------|--------------|
| Sample size                        | N=43,778      | N=10,109             | N=1122           | N=2481                          | N=2814         | N=12,257      |              |
| Alcohol or drug                    | 9.0 (8.7–9.3) | 5.0 (4.4–5.7)        | 15.0 (11.3–20.0) | 3.5 (2.7–4.6)                   | 9.2 (7.5–11.2) | 7.7 (6.8–8.7) | <.01         |
| Alcohol and drug                   | 2.3 (2.1–2.5) | 0.9 (0.7–1.3)        | 3.1 (2.1–4.6)    | 0.6 (0.3–1.1)                   | 3.5 (2.4–5.0)  | 2.3 (1.8–2.8) | <.01         |
| Alcohol                            | 6.3 (6.1–6.6) | 2.3 (1.9–2.8)        | 9.4 (6.4–13.4)   | 2.1 (1.5–2.9)                   | 6.3 (4.8–8.3)  | 5.5 (4.8–6.4) | <.01         |
| Any drug <sup>a</sup>              | 5.0 (4.7–5.2) | 3.7 (3.2–4.2)        | 8.7 (6.4–11.7)   | 2.0 (1.4–2.8)                   | 6.4 (5.2–7.9)  | 4.4 (3.8–5.1) | <.01         |
| Marijuana                          | 3.7 (3.4–3.9) | 2.8 (2.4–3.4)        | 6.2 (4.1–9.3)    | 1.5 (1.0–2.3)                   | 4.6 (3.6–5.8)  | 3.2 (2.6–3.8) | <.01         |
| Inhalants                          | 0.4 (0.4–0.5) | 0.3 (0.2–0.5)        | 1.1 (0.5–2.4)    | 0.2 (0–0.7)                     | 0.6 (0.3–1.1)  | 0.4 (0.3–0.6) | <.05         |
| Analgesic opioids                  | 1.2 (1.1–1.3) | 0.6 (0.5–0.8)        | 1.2 (0.7–2.2)    | 0.3 (0.1–0.7)                   | 2.2 (1.3–3.5)  | 1.0 (0.7–1.3) | <.01         |
| Stimulants                         | 0.4 (0.3–0.5) | 0.1 (0–0.2)          | 0.3 (0.1–0.9)    | 0.2 (0.1–0.8)                   | 0.5 (0.2–1.1)  | 0.3 (0.2–0.5) | <.01         |
| Tranquilizers                      | 0.4 (0.3–0.4) | 0.1 (0.1–0.3)        | 0.5 (0.2–1.5)    | 0.2 (0–1.2)                     | 0.3 (0.1–1.1)  | 0.1 (0–0.3)   | <.01         |

Abbreviation: CI, confidence interval.

Results for cocaine (0.4% of the sample), hallucinogen (0.4%), heroin (0.04%), and sedative (0.1%) use disorders are not reported due to a small sample size of adolescents with the disorders or non-significance by race/ethnicity.

<sup>a</sup> Any drug includes any of the following: marijuana, inhalants, cocaine, hallucinogens, heroin, analgesic opioids, stimulants, sedatives, and tranquilizers.

**eTable 4.** Mean number of days using the substance in the past year among past-year adolescent users of the corresponding substance by race or ethnicity

| Mean number of substance use: Mean (95% CI) | White            | African-American | Native-American   | Asian or Pacific Islander | Multiple-Race     | Hispanic         | $\chi^2$ (5) <i>P</i> -value |
|---------------------------------------------|------------------|------------------|-------------------|---------------------------|-------------------|------------------|------------------------------|
| Alcohol                                     | 35.8 (34.6–37.0) | 29.5 (27.2–31.8) | 39.1 (32.8–45.5)  | 26.9 (21.4–32.4)          | 37.1 (31.8–42.4)  | 40.0 (37.5–42.5) | <.01                         |
| Marijuana                                   | 80.6 (77.0–84.3) | 80.6 (73.4–87.7) | 82.0 (61.8–102.1) | 48.4 (33.4–63.4)          | 98.6 (77.6–119.6) | 72.6 (64.7–80.5) | <.01                         |
| Inhalants                                   | 26.1 (23.4–28.7) | 39.5 (31.3–47.7) | 32.2 (14.7–49.6)  | 49.8 (18.3–81.4)          | 19.8 (13.5–26.2)  | 31.5 (24.2–38.8) | <.01                         |
| Analgesic opioids                           | 36.2 (33.8–38.6) | 45.7 (38.0–53.4) | 67.7 (44.2–91.3)  | 33.2 (17.1–49.4)          | 50.7 (38.1–63.4)  | 42.7 (35.4–49.9) | <.01                         |

CI: confidence interval.

Results for cocaine, hallucinogens, heroin, stimulants, sedatives, and tranquilizers are not reported due to non-significance by race/ethnicity.

**eTable 5.** Conditional one-year prevalence (%) of *substance use disorders among adolescent users* of each corresponding substance by race or ethnicity

| Abuse or dependence       | Analysis sample    | White            | African-American | Native-American  | Asian or Pacific Islander | Multiple-Race    | Hispanic         | $\chi^2$ (5) |
|---------------------------|--------------------|------------------|------------------|------------------|---------------------------|------------------|------------------|--------------|
| Conditional prevalence, % | Users of substance | % (95% CI)       | % (95% CI)       | % (95% CI)       | % (95% CI)                | % (95% CI)       | % (95% CI)       |              |
| Alcohol or drug           | 27,705             | 22.9 (22.1–23.6) | 15.5 (13.7–17.5) | 31.5 (23.6–40.5) | 14.9 (11.4–19.3)          | 25.2 (20.9–30.0) | 21.0 (18.7–23.5) | <.01         |
| Alcohol and drug          | 11,240             | 14.3 (13.2–15.5) | 8.3 (5.9–11.5)   | 15.2 (10.1–22.2) | 8.3 (4.4–15.1)            | 19.4 (13.5–27.1) | 16.2 (13.3–19.7) | <.01         |
| Alcohol                   | 24,294             | 17.9 (17.2–18.7) | 9.1 (7.5–11.0)   | 25.4 (17.5–35.2) | 11.1 (8.2–15.0)           | 20.2 (15.5–26.0) | 17.1 (14.9–19.5) | <.01         |
| Any drug <sup>a</sup>     | 14,651             | 24.8 (23.7–25.9) | 19.6 (17.1–22.4) | 28.0 (21.6–35.3) | 17.1 (12.3–23.3)          | 27.3 (22.0–33.3) | 24.2 (21.3–27.4) | <.01         |
| Marijuana                 | 10,009             | 26.2 (24.9–27.6) | 23.3 (19.7–27.3) | 26.3 (19.0–35.2) | 25.8 (18.6–34.7)          | 28.0 (22.0–34.9) | 27.0 (23.2–31.1) | NS           |
| Inhalants                 | 3232               | 9.7 (8.1–11.7)   | 10.7 (7.1–15.7)  | 20.0 (10.5–34.8) | 6.1 (1.4–23.2)            | 12.9 (6.9–22.7)  | 9.3 (7.1–12.0)   | NS           |
| Cocaine                   | 1107               | 22.8 (19.3–26.7) | 14.2 (3.0–47.3)  | 16.1 (3.7–48.8)  | 20.9 (4.1–62.3)           | 29.7 (15.9–48.4) | 26.8 (19.5–35.6) | NS           |
| Hallucinogens             | 2028               | 17.1 (14.6–20.0) | 11.4 (5.1–23.4)  | 12.9 (4.9–29.6)  | 12.3 (3.5–35.6)           | 12.7 (5.3–27.5)  | 20.4 (14.8–27.4) | NS           |
| Analgesic opioids         | 5141               | 15.9 (14.2–17.7) | 11.2 (8.4–14.6)  | 12.4 (6.6–21.9)  | 7.3 (3.3–15.5)            | 24.5 (15.0–37.4) | 17.2 (13.8–21.4) | <.01         |
| Stimulants                | 1303               | 16.7 (13.6–20.4) | 11.5 (5.9–21.1)  | 11.8 (3.6–32.2)  | 25.9 (6.7–62.9)           | 24.4 (10.9–45.8) | 21.2 (13.9–31.0) | NS           |
| Tranquilizers             | 1419               | 13.3 (11.3–15.6) | 21.2 (9.9–39.8)  | 20.2 (7.3–46.3)  | 34.6 (7.7–77.1)           | 12.8 (4.6–31.0)  | 11.4 (5.5–22.2)  | NS           |

Abbreviation: CI, confidence interval; NS, not significant by race/ethnicity ( $P>.05$ ).

Results for heroin users (n=107) and sedative users (n=342) are not reported due a small sample size.

<sup>a</sup> Any drug includes any of the following: marijuana, inhalants, cocaine, hallucinogens, heroin, analgesic opioids, stimulants, sedatives, and tranquilizers.

**eTable 6.** One-year conditional prevalence of *substance abuse vs. substance dependence among adolescent users* of each corresponding substance by race or ethnicity

| Abuse or dependence       | Users of substance | White                         | African-American | Native-American  | Asian or Pacific Islander  | Multiple-Race               | Hispanic                      | $\chi^2$ (5)<br>P-value |
|---------------------------|--------------------|-------------------------------|------------------|------------------|----------------------------|-----------------------------|-------------------------------|-------------------------|
| Conditional prevalence, % | Disorder           | % (95% CI)                    | % (95% CI)       | % (95% CI)       | % (95% CI)                 | % (95% CI)                  | % (95% CI)                    |                         |
| Alcohol or drug           | Abuse              | 14.2 (13.6–14.8) <sup>a</sup> | 8.7 (7.4–10.1)   | 18.0 (12.0–26.1) | 7.0 (5.0–9.8)              | 13.9 (10.7–17.9)            | 13.7 (12.0–15.6) <sup>a</sup> | <.01                    |
|                           | Depend             | 11.2 (10.6–11.9)              | 8.1 (6.7–9.6)    | 16.3 (11.7–22.2) | 9.0 (6.2–12.9)             | 15.1 (11.6–19.5)            | 10.2 (8.7–11.8)               | <.01                    |
| Alcohol and drug          | Abuse              | 3.8 (3.3–4.4)                 | 1.9 (1.2–3.1)    | 3.1 (1.4–6.4)    | 0.6 (0.1–2.8)              | 2.5 (1.2–5.1)               | 4.1 (2.7–6.3)                 | <.01                    |
|                           | Depend             | 4.5 (3.9–5.1)                 | 2.9 (1.8–4.6)    | 5.6 (2.5–12.0)   | 3.7 (1.2–10.9)             | 9.1 (4.9–16.3)              | 4.6 (3.4–6.3)                 | <.01                    |
| Alcohol                   | Abuse              | 11.4 (10.8–12.0) <sup>a</sup> | 4.8 (3.9–5.9)    | 14.7 (8.8–23.6)  | 6.4 (4.3–9.3)              | 11.1 (8.0–15.1)             | 10.4 (8.8–12.2) <sup>a</sup>  | <.01                    |
|                           | Depend             | 6.5 (6.0–7.1)                 | 4.4 (3.2–5.9)    | 10.7 (6.9–16.1)  | 4.8 (2.7–8.2)              | 9.2 (5.9–14.0)              | 6.7 (5.5–8.2)                 | <.01                    |
| Any drug <sup>b</sup>     | Abuse              | 10.7 (10.0–11.5)              | 9.7 (8.0–11.8)   | 12.1 (7.5–18.8)  | 4.3 (2.2–8.1) <sup>a</sup> | 8.9 (5.9–13.2) <sup>a</sup> | 12.2 (10.4–14.3)              | <.01                    |
|                           | Depend             | 14.1 (13.1–15.1)              | 9.9 (8.3–11.8)   | 15.9 (10.7–23.0) | 12.8 (8.7–18.6)            | 18.4 (13.7–24.3)            | 12.0 (10.1–14.2)              | <.01                    |
| Marijuana                 | Abuse              | 12.5 (11.5–13.5)              | 11.5 (9.1–14.5)  | 11.9 (6.6–20.4)  | 8.9 (4.9–15.5)             | 11.7 (7.6–17.7)             | 13.9 (10.7–17.8)              | NS                      |
|                           | Depend             | 13.7 (12.8–14.8)              | 11.8 (9.4–14.7)  | 14.4 (8.5–23.5)  | 16.9 (10.6–25.9)           | 16.3 (11.5–22.5)            | 13.1 (10.9–15.7)              | NS                      |
| Inhalants                 | Abuse              | 6.5 (5.2–8.2) <sup>a</sup>    | 7.9 (4.8–12.9)   | 13.8 (5.7–30.0)  | 2.2 (0.5–9.3)              | 9.1 (4.0–19.3)              | 5.9 (4.0–8.8)                 | NS                      |
|                           | Depend             | 3.2 (2.4–4.3)                 | 2.8 (1.3–6.1)    | 6.2 (2.0–17.6)   | 3.9 (0.5–25.4)             | 3.8 (1.7–8.4)               | 3.3 (1.8–6.1)                 | NS                      |
| Cocaine                   | Abuse              | 9.7 (7.3–12.7)                | -----            | 3.9 (0.7–19.1)   | 20.9 (4.1–62.3)            | 2.8 (0.9–8.2)               | 12.6 (7.6–20.2)               | -----                   |
|                           | Depend             | 13.1 (10.3–16.5)              | 14.2 (3.0–47.3)  | 12.2 (2.1–47.5)  | -----                      | 26.9 (14.0–45.4)            | 14.2 (9.2–21.3)               | -----                   |
| Hallucinogens             | Abuse              | 10.9 (9.1–13.0)               | 6.1 (2.2–15.6)   | 9.5 (3.4–23.5)   | 10.0 (2.3–34.1)            | 7.3 (2.9–17.3)              | 14.0 (8.9–21.2)               | NS                      |
|                           | Depend             | 6.3 (4.7–8.3)                 | 5.3 (1.5–17.0)   | 3.4 (0.8–14.0)   | 2.4 (0.6–8.9)              | 5.4 (1.2–21.6)              | 6.4 (3.4–11.9)                | NS                      |
| Analgesic opioids         | Abuse              | 6.6 (5.5–7.8)                 | 6.1 (4.0–9.3)    | 4.9 (1.9–12.4)   | 3.0 (0.8–10.6)             | 8.3 (4.6–14.5)              | 8.2 (2.6–11.8)                | NS                      |
|                           | Depend             | 9.3 (7.9–11.0)                | 5.0 (3.4–7.3)    | 7.5 (3.3–16.0)   | 4.4 (1.5–12.1)             | 16.2 (8.4–29.0)             | 9.1 (6.2–13.0)                | <.01                    |
| Stimulants                | Abuse              | 7.5 (5.5–10.0)                | 5.4 (1.9–14.4)   | 4.8 (0.6–28.1)   | 12.6 (2.0–49.9)            | 1.4 (0.2–9.9)               | 7.2 (2.9–17.0)                | NS                      |
|                           | Depend             | 9.2 (6.7–12.7)                | 6.1 (2.6–13.3)   | 7.0 (1.7–25.1)   | 13.3 (1.8–56.6)            | 23.0 (9.7–45.4)             | 14.0 (8.1–23.2)               | NS                      |
| Tranquilizers             | Abuse              | 7.9 (6.3–9.9)                 | 8.2 (3.2–19.3)   | 8.9 (1.4–40.9)   | 2.7 (0.3–18.9)             | 3.7 (0.9–14.0)              | 7.9 (3.3–17.6)                | NS                      |
|                           | Depend             | 5.4 (4.4–7.2)                 | 13.1 (4.2–34.2)  | 11.7 (3.7–31.7)  | 32.0 (6.2–77.0)            | 9.2 (2.3–30.6)              | 3.6 (1.1–10.6)                | NS                      |

Abbreviations: CI, confidence interval; depend, DSM–IV dependence; NS, not significant by race/ethnicity ( $P > .05$ ).

Results for heroin (n=107) and sedative (n=342) use disorders are not reported due to a small sample size of users.

-----: Not reported due to small cell sizes.

<sup>a</sup> There were significant differences in abuse versus dependence ( $P < .05$ ).

<sup>b</sup> Any drug includes any of the following: marijuana, inhalants, cocaine, hallucinogens, heroin, analgesic opioids, stimulant, sedatives, and tranquilizers.

**eTable 7.** Selected characteristics of multiple-race adolescents aged 12–17 years (N=2814)

| Selected characteristics:<br>Proportion (95% CI) | Total            | Past-year alcohol<br>users | Past-year alcohol<br>users who met<br>criteria for an alcohol<br>use disorder | Past-year illicit or<br>nonmedical drug<br>users | Past-year illicit or<br>nonmedical drug users<br>who met criteria for an<br>illicit or prescription<br>drug use disorder |
|--------------------------------------------------|------------------|----------------------------|-------------------------------------------------------------------------------|--------------------------------------------------|--------------------------------------------------------------------------------------------------------------------------|
| Sample size                                      | N = 2814         | n = 948                    | n = 195                                                                       | n = 677                                          | n = 189                                                                                                                  |
| Age in years                                     |                  |                            |                                                                               |                                                  |                                                                                                                          |
| 12–13                                            | 35.8 (33.2–38.5) | 11.6 (9.0–14.8)            | 4.0 (1.74–8.92)                                                               | 14.9 (12.0–18.4)                                 | 6.6 (3.5–12.0)                                                                                                           |
| 14–15                                            | 32.9 (30.5–35.4) | 35.0 (30.1–40.3)           | 26.0 (18.4–35.3)                                                              | 31.9 (27.5–36.6)                                 | 30.2 (20.2–42.5)                                                                                                         |
| 16–17                                            | 31.3 (29.0–33.8) | 53.4 (48.8–58.0)           | 70.0 (60.3–78.3)                                                              | 53.3 (48.0–58.4)                                 | 63.3 (51.7–73.5)                                                                                                         |
| Gender                                           |                  |                            |                                                                               |                                                  |                                                                                                                          |
| Male                                             | 47.1 (43.9–50.4) | 43.3 (37.5–48.2)           | 39.2 (27.3–52.5)                                                              | 43.5 (36.8–50.5)                                 | 45.3 (35.9–55.0)                                                                                                         |
| Female                                           | 52.9 (49.6–56.1) | 56.7 (50.8–62.5)           | 60.8 (47.5–72.7)                                                              | 56.5 (49.5–63.2)                                 | 54.8 (45.0–64.1)                                                                                                         |
| Family income                                    |                  |                            |                                                                               |                                                  |                                                                                                                          |
| <\$40,000                                        | 35.4 (32.7–38.2) | 36.1(31.3–41.2)            | 34.4 (24.1–46.5)                                                              | 39.8 (33.2–46.7)                                 | 32.9 (24.2–43.0)                                                                                                         |
| \$40,000–\$74,999                                | 34.0 (30.8–37.2) | 34.9 (30.0–40.1)           | 34.2 (23.8–46.4)                                                              | 32.2 (26.3–38.8)                                 | 41.2 (28.8–54.9)                                                                                                         |
| \$75,000+                                        | 30.7 (27.6–33.9) | 29.0 (24.2–34.4)           | 31.4 (20.1–45.3)                                                              | 28.0 (21.9–35.1)                                 | 25.9 (15.2–40.6)                                                                                                         |
| Population density                               |                  |                            |                                                                               |                                                  |                                                                                                                          |
| Large metropolitan                               | 48.6 (45.5–51.7) | 46.8 (40.9–52.8)           | 44.9 (33.8–56.6)                                                              | 48.8 (41.1–56.5)                                 | 42.1 (32.0–52.9)                                                                                                         |
| Small metropolitan                               | 46.4 (43.3–49.6) | 48.7 (42.9–54.6)           | 45.6 (34.2–57.6)                                                              | 46.5 (39.3–53.9)                                 | 49.6 (39.3–59.9)                                                                                                         |
| Non-metropolitan                                 | 5.0 (4.1–6.0)    | 4.4 (3.0–6.6)              | 9.5 (4.3–19.8)                                                                | 4.7 (2.9–7.6)                                    | 8.3 (3.3–19.4)                                                                                                           |
| Poor or fair self-rated<br>health                |                  |                            |                                                                               |                                                  |                                                                                                                          |
| Yes                                              | 4.2 (3.3–5.3)    | 4.5 (3.0–6.6)              | 3.4 (1.7–8.2)                                                                 | 5.5 (3.9–7.7)                                    | 5.3 (2.4–11.4)                                                                                                           |
| No                                               | 95.8 (94.7–96.7) | 95.5 (93.5–97.0)           | 96.3 (91.8–98.3)                                                              | 94.5 (92.3–96.1)                                 | 94.7 (88.6–97.6)                                                                                                         |

Abbreviation: CI, confidence interval.

**eTable 8.** Adjusted odds ratios (AOR) of one-year conditional prevalence of substance use disorders (abuse or dependence) among adolescent users of each corresponding substance by race or ethnicity

| Adjusted logistic regression model <sup>a</sup> | Analysis sample             | White                   | African-American | Native-American         | Asian or Pacific Islander | Multiple-Race           | Hispanic                |
|-------------------------------------------------|-----------------------------|-------------------------|------------------|-------------------------|---------------------------|-------------------------|-------------------------|
| Abuse or dependence, yes                        | Users of specific substance | AOR (95% CI)            | Reference        | AOR (95% CI)            | AOR (95% CI)              | AOR (95% CI)            | AOR (95% CI)            |
| Alcohol or drug                                 | 27,705                      | <b>1.68 (1.45–1.96)</b> | 1.00             | <b>2.64 (1.70–4.10)</b> | 0.97 (0.67–1.40)          | <b>1.93 (1.49–2.49)</b> | <b>1.48 (1.20–1.84)</b> |
| Alcohol and drug                                | 11,240                      | <b>1.86 (1.25–2.75)</b> | 1.00             | <b>1.93 (1.11–3.36)</b> | 1.01 (0.47–2.16)          | <b>2.66 (1.62–4.38)</b> | <b>2.19 (1.37–3.52)</b> |
| Alcohol                                         | 24,294                      | <b>2.15 (1.73–2.68)</b> | 1.00             | <b>3.36 (1.96–5.74)</b> | 1.22 (0.84–1.79)          | <b>2.55 (1.84–3.53)</b> | <b>2.11 (1.59–2.79)</b> |
| Any drug <sup>b</sup>                           | 14,651                      | <b>1.41 (1.19–1.69)</b> | 1.00             | <b>1.64 (1.07–2.50)</b> | 0.91 (0.56–1.48)          | <b>1.59 (1.16–2.20)</b> | <b>1.35 (1.06–1.70)</b> |
| Analgesic opioids                               | 5141                        | <b>1.46 (1.02–2.07)</b> | 1.00             | 1.02 (0.47–2.21)        | 0.66 (0.25–1.72)          | <b>2.42 (1.21–4.81)</b> | <b>1.63 (1.07–2.49)</b> |

Bold face:  $P < .05$ ; results for marijuana, inhalant, cocaine, hallucinogen, stimulant, and tranquilizer use disorders are not reported due to non-significance by race/ethnicity ( $P > .05$ ).

<sup>a</sup>Each adjusted logistic regression model of each corresponding disorder included race/ethnicity controlling for age, gender, family income, population density of residence, self-rated health, and survey year.

<sup>b</sup>Any drug includes any of the following: marijuana, inhalants, cocaine, hallucinogens, heroin, analgesic opioids, stimulant, sedatives, and tranquilizers.
